# Supplementary material for: Oxidative dehydrogenation of ethane: catalytic and mechanistic aspects and future trends
Source: Royal Society of Chemistry journal article supplement (doi:10.1039/d0cs01518k), 2021-01-01
Supplement: d0cs01518k1.pdf [file d0cs01518k1.pdf]

## Oxidative dehydrogenation of ethane: Catalytic and mechanistic aspects and future trends

Sara Najari<sup>a</sup>, Samrand Saeidi<sup>\*a</sup>, Patricia Concepcion<sup>b</sup>, Dionysios D. Dionysiou<sup>c</sup>, Suresh K. Bhargava,<sup>d</sup> Adam F. Lee,<sup>d</sup> Karen Wilson<sup>\*d</sup>

### Supporting Information

**Table S1.** Catalytic efficiency of metal oxide materials in the ethane ODH reaction.

| Data point No. in Figure 47 | Catalyst                                                                       | Oxidant        | Selectivity % | Conversion % | Temperature (°C) | Yield % | Ref. |
|-----------------------------|--------------------------------------------------------------------------------|----------------|---------------|--------------|------------------|---------|------|
| 1                           | LaSr <sub>0.02</sub> O <sub>x</sub>                                            | O <sub>2</sub> | 64            | 46           | 800              | 34-46   | 1    |
|                             | SmSr <sub>0.2</sub> O <sub>x</sub>                                             |                | 66            | 52           | 855              |         |      |
|                             | SmNa <sub>0.028</sub> P <sub>0.014</sub> O <sub>x</sub>                        |                | 68            | 67           | 867              |         |      |
| 2                           | Sr-La <sub>2</sub> O <sub>3</sub> (Sr/La=0.1)                                  | O <sub>2</sub> | 83.4          | 59.1         | 850              | -       | 2    |
| 3                           | Sm <sub>2</sub> O <sub>3</sub>                                                 | O <sub>2</sub> | 60.6          | 8.2          | 700              | -       | 3    |
|                             | 90La-NaAl                                                                      |                | 77.5          | 17.2         |                  | -       |      |
| 4                           | YBa <sub>2</sub> Cu <sub>3</sub> O <sub>7-0.21</sub> F <sub>0.16</sub>         | O <sub>2</sub> | 81.8          | 84.1         | 680              | 68.8    | 4    |
|                             | YBa <sub>2</sub> Cu <sub>3</sub> O <sub>7-0.18</sub> Cl <sub>0.13</sub>        |                | 72            | 92.5         |                  | 66.6    |      |
| 5                           | La <sub>0.8</sub> Sr <sub>0.2</sub> FeO <sub>3-0.103</sub> F <sub>0.216</sub>  | O <sub>2</sub> | 62.1          | 76.8         | 660              | 47.7    | 5    |
|                             | La <sub>0.8</sub> Sr <sub>0.2</sub> FeO <sub>3-0.103</sub> Cl <sub>0.164</sub> |                | 68.4          | 84.4         |                  | 57.6    |      |
| 6                           | La <sub>1.6</sub> Sr <sub>0.4</sub> CuO <sub>3.857</sub> X <sub>0.143</sub>    | O <sub>2</sub> | 76.7          | 83.2         | 660              | 63.8    | 6    |
|                             | La <sub>1.6</sub> Sr <sub>0.4</sub> CuO <sub>3.856</sub> X <sub>0.126</sub>    |                | 74.6          | 79.6         |                  | 59.4    |      |
| 7                           | Sr <sub>0.63</sub> Ca <sub>0.27</sub> CuO <sub>1.901</sub> X <sub>0.088</sub>  | O <sub>2</sub> | 67.2          | 73.5         | 650              | -       | 7    |
|                             | Sr <sub>0.63</sub> Ca <sub>0.27</sub> CuO <sub>1.950</sub> X <sub>0.036</sub>  |                | 74.4          | 87.4         |                  | 680     |      |
| 8                           | Ba(Ce <sub>0.9</sub> Ca <sub>0.1</sub> )O <sub>2.9</sub>                       | O <sub>2</sub> | 59            | 60           | 750              | 35      | 8    |
|                             | Ba(Ce <sub>0.9</sub> Y <sub>0.1</sub> )O <sub>2.95</sub>                       |                | 11            | 21           |                  | 2.3     |      |
|                             | Ba(Ce <sub>0.9</sub> La <sub>0.1</sub> )O <sub>2.95</sub>                      |                | 48            | 50           |                  | 24      |      |
|                             | Ba(Ce <sub>0.9</sub> Nd <sub>0.1</sub> )O <sub>2.95</sub>                      |                | 57            | 55           |                  | 31      |      |
| 9                           | α-Sb <sub>2</sub> O <sub>4</sub> + Mo-V-O                                      | O <sub>2</sub> | 28.1          | 11.7         | 500              | 3.3     | 9    |
|                             | α-Sb <sub>2</sub> O <sub>4</sub> + Ni-V-O                                      |                | 21.2          | 8.5          |                  | 1.8     |      |
| 10                          | Ga/Cr-ZrP                                                                      | O <sub>2</sub> | 25            | 7.4          | 400              | -       | 10   |
|                             | Al/Cr-ZrP                                                                      |                | 23.9          | 5.4          |                  | -       |      |
| 11                          | Mo <sub>6</sub> V <sub>2</sub> Al <sub>1</sub> O <sub>x</sub>                  | O <sub>2</sub> | 70.4          | 3.9          | 340              | -       | 11   |
|                             | Mo <sub>6</sub> V <sub>2</sub> Ga <sub>1</sub> O <sub>x</sub>                  |                | 69            | 5.6          |                  |         |      |
|                             | Mo <sub>6</sub> V <sub>2</sub> Bi <sub>1</sub> O <sub>x</sub>                  |                |               |              |                  |         |      |
|                             | Mo <sub>6</sub> V <sub>2</sub> Sb <sub>1</sub> O <sub>x</sub>                  |                |               |              |                  |         |      |
|                             | Mo <sub>6</sub> V <sub>2</sub> Te <sub>1</sub> O <sub>x</sub>                  |                |               |              |                  |         |      |
|                             |                                                                                | 74.7           | 16.8          |              |                  |         |      |
|                             |                                                                                | 72.5           | 18.2          |              |                  |         |      |
|                             | Co <sub>1.5</sub> Mg <sub>1.5</sub> (PO <sub>4</sub> ) <sub>2</sub>            | O <sub>2</sub> | 69.4          | 10           | 550              | -       | 12   |
|                             | Pt/γ-Al <sub>2</sub> O <sub>3</sub>                                            | O <sub>2</sub> | 64.7          | 59.9         | 936              | -       | 13   |

|    |                                                                                                                                                             |                                  |       |      |     |      |        |
|----|-------------------------------------------------------------------------------------------------------------------------------------------------------------|----------------------------------|-------|------|-----|------|--------|
| 12 | BaMnAl <sub>11</sub> O <sub>19</sub>                                                                                                                        |                                  | 68    | 75.9 | 980 |      |        |
| 13 | La <sub>1.85</sub> Sr <sub>0.15</sub> CuO <sub>3.930</sub> Cl <sub>0.053</sub>                                                                              | O <sub>2</sub>                   | 73.2  | 82.8 | 660 | -    | 14     |
|    | Nd <sub>1.85</sub> Ce <sub>0.15</sub> CuO <sub>3.981</sub> F <sub>0.092</sub>                                                                               |                                  | 61.8  | 72.1 |     |      |        |
|    | La <sub>0.8</sub> Ba <sub>0.2</sub> Mn <sub>0.7</sub> Cu <sub>0.3</sub> O <sub>2.808</sub> F <sub>0.124</sub>                                               | O <sub>2</sub>                   | 66.8  | 49.2 | 680 | 32.9 | 15     |
|    | La <sub>0.8</sub> Ba <sub>0.2</sub> Mn <sub>0.7</sub> Cu <sub>0.3</sub> O <sub>2.817</sub> Cl <sub>0.114</sub>                                              |                                  | 69.5  | 73   |     | 50.8 |        |
| 14 | Fe <sup>3+</sup> -Cs <sub>2.5</sub> H <sub>1.5</sub> PVMo <sub>11</sub> O <sub>40</sub>                                                                     | O <sub>2</sub>                   | 39    | 10   | 425 | 3.9  | 16     |
| 15 | Sr <sub>0.1</sub> La <sub>0.1</sub> Nd <sub>1</sub> O <sub>x</sub>                                                                                          | O <sub>2</sub>                   | 70.8  | 79.2 | 940 | 56.1 | 17     |
|    | Bi <sub>2</sub> Sr <sub>2</sub> CaCu <sub>2</sub> O <sub>7.811</sub> F <sub>0.366</sub>                                                                     | O <sub>2</sub>                   | 72.5  | 70.8 | 680 | 51.3 | 18     |
| 16 | Bi <sub>2</sub> Sr <sub>2</sub> CaCu <sub>2</sub> O <sub>7.901</sub> Cl <sub>0.394</sub>                                                                    |                                  | 76.6  | 77.2 |     | 59.1 |        |
| 17 | LaMnO <sub>3</sub> /γ-Al <sub>2</sub> O <sub>3</sub>                                                                                                        | O <sub>2</sub>                   | 65    | 84   | 950 | 55   | 19     |
| 18 | Fe <sub>x</sub> P <sub>y</sub> O <sub>z</sub>                                                                                                               | O <sub>2</sub>                   | 85.9  | 26.6 | 650 | -    | 20     |
| 19 | Sr <sub>0.1</sub> La <sub>0.1</sub> Nd <sub>1</sub> O <sub>x</sub>                                                                                          | O <sub>2</sub>                   | 71.2  | 65.2 | 700 | 46.4 | 21     |
| 20 | Mo-V-Nb-O (1-0.6-0.12)                                                                                                                                      | O <sub>2</sub>                   | 60.5  | 21.5 | 400 | 13   | 22     |
| 21 | V-Mg-O (V/Mg=10.6)                                                                                                                                          | O <sub>2</sub>                   | 78.29 | 43.6 | 600 | 34.1 | 23     |
| 22 | LiCl-Dy-Mg-O                                                                                                                                                | O <sub>2</sub>                   | 87.5  | 88   | 610 | 77   | 24     |
| 23 | Co <sub>0.280</sub> Cr <sub>0.398</sub> Sn <sub>0.158</sub> W <sub>0.164</sub> O <sub>x</sub>                                                               | O <sub>2</sub>                   | 63    | 33   | 500 | 21   | 25     |
|    | Co <sub>0.086</sub> Cr <sub>0.249</sub> Ca <sub>0.196</sub><br>Mn <sub>0.208</sub> P <sub>0.074</sub> Sn <sub>0.093</sub> W <sub>0.164</sub> O <sub>x</sub> |                                  | 46    | 30   |     | 14   |        |
|    | Cr <sub>0.501</sub> Mo <sub>0.471</sub> Sn <sub>0.028</sub> O <sub>x</sub>                                                                                  |                                  | 56    | 32   |     | 18   |        |
|    | Cr <sub>0.693</sub> Mo <sub>0.284</sub> Au <sub>0.023</sub> O <sub>x</sub>                                                                                  |                                  | 52    | 34   |     | 18   |        |
|    | Cr <sub>0.426</sub> Mo <sub>0.161</sub> Ga <sub>0.245</sub> Sn <sub>0.043</sub> Zr <sub>0.124</sub> O <sub>x</sub>                                          |                                  | 53    | 32   |     | 17   |        |
|    | Cr <sub>0.601</sub> Mo <sub>0.246</sub> Au <sub>0.041</sub> Mn <sub>0.0112</sub> O <sub>x</sub>                                                             |                                  | 54    | 32   |     | 17   |        |
|    | Cr <sub>0.570</sub> Mo <sub>0.233</sub> Au <sub>0.038</sub> Ga <sub>0.109</sub> Zr <sub>0.049</sub> O <sub>x</sub>                                          |                                  | 51    | 32   |     | 16   |        |
|    | Cr <sub>0.790</sub> Mo <sub>0.290</sub> O <sub>x</sub>                                                                                                      |                                  | 54    | 32   |     | 17   |        |
|    | Sn <sub>0.49</sub> W <sub>0.51</sub> O <sub>x</sub>                                                                                                         |                                  | 71    | 1    |     | 1    |        |
| 24 | Mo <sub>0.71</sub> V <sub>0.21</sub> Nb <sub>0.08</sub> O <sub>x</sub>                                                                                      | O <sub>2</sub>                   | 96    | 5    | 570 | -    | 26     |
| 25 | Ni <sub>0.62</sub> Ta <sub>0.10</sub> Nb <sub>0.28</sub> O <sub>x</sub>                                                                                     | O <sub>2</sub>                   | 86.2  | 20.5 | 300 | -    | 27     |
| 26 | 4Zr-VPO                                                                                                                                                     | O <sub>2</sub>                   | 80    | 10   | 475 | -    | 28     |
|    | 3Bi-VPO                                                                                                                                                     |                                  | 74.5  | 10   |     | -    |        |
| 27 | MoV <sub>0.39</sub> Te <sub>0.16</sub> Nb <sub>0.17</sub> O <sub>x</sub>                                                                                    | O <sub>2</sub>                   | 93.9  | 39.8 | 380 | -    | 29     |
|    | MoV <sub>0.1</sub> Nb <sub>0.21</sub> Te <sub>0.01</sub> O <sub>x</sub>                                                                                     | O <sub>2</sub>                   | 72.2  | 13.6 | 400 | -    | 30     |
| 28 | MoV <sub>0.14</sub> Nb <sub>0.17</sub> Te <sub>0.19</sub> O <sub>x</sub>                                                                                    |                                  | 94.9  | 27.3 | 400 | -    |        |
| 29 | Ca <sub>10-x</sub> Co <sub>x</sub> (PO <sub>4</sub> ) <sub>6</sub> (OH) <sub>2</sub>                                                                        | O <sub>2</sub>                   | 63    | 35   | 550 | 22   | 31     |
|    | Nb <sub>0.6</sub> PMo <sub>12</sub> Pyr                                                                                                                     | O <sub>2</sub>                   | 29    | 16   | 380 | -    | 32     |
|    | Nb <sub>0.4</sub> PMo <sub>12</sub> Pyr                                                                                                                     |                                  | 28    | 17   |     | -    |        |
|    | Nb <sub>0.68</sub> PMo <sub>11</sub> VPyr                                                                                                                   |                                  | 36    | 7.4  |     | -    |        |
|    | Nb <sub>0.2</sub> PMo <sub>11</sub> VPyr                                                                                                                    |                                  | 41    | 5.5  |     | -    |        |
| 30 | Nb <sub>0.5</sub> PMo <sub>11</sub> GaPyr                                                                                                                   |                                  | 30    | 18   |     | -    |        |
| 31 | V/TiP                                                                                                                                                       | O <sub>2</sub>                   | 56.5  | 31.8 | 700 | -    | 33     |
| 32 | MoV <sub>0.31</sub> Te <sub>0.2</sub> Nb <sub>0.14</sub> O <sub>x</sub>                                                                                     | O <sub>2</sub>                   | 87    | 90   | 400 | -    | 34     |
| 33 | MoV <sub>0.18</sub> Sb <sub>0.15</sub> O                                                                                                                    | O <sub>2</sub>                   | 81.5  | 64.6 | 400 | 52.5 | 35     |
| 34 | Ni <sub>0.85</sub> Nb <sub>0.15</sub> O                                                                                                                     | O <sub>2</sub>                   | 70    | 66   | 400 | 46   | 36, 37 |
| 35 | Cr/Ts(30)                                                                                                                                                   | CO <sub>2</sub>                  | 90    | 52.7 | 650 | 47.4 | 38     |
| 36 | Cr-O                                                                                                                                                        | O <sub>2</sub> , CO <sub>2</sub> | 72    | 29   | 400 | -    | 39     |
| 37 | Ni <sub>0.85</sub> Nb <sub>0.15</sub> O <sub>x</sub>                                                                                                        | O <sub>2</sub>                   | 67.8  | 66.7 | 400 | -    | 40     |
| 38 | Li-Sr-MD                                                                                                                                                    | O <sub>2</sub>                   | 91    | 44   | 580 | -    | 41     |
|    | Li-Ba-MD                                                                                                                                                    |                                  | 88    | 40   |     | -    |        |
|    | Li-Na-MD                                                                                                                                                    |                                  | 86    | 46   |     | -    |        |
|    | Li-K-MD                                                                                                                                                     |                                  | 96    | 27   |     | -    |        |
| 39 | Co-BaCO <sub>3</sub>                                                                                                                                        | CO <sub>2</sub>                  | 92.2  | 48   | 650 | 44.3 | 42     |
| 40 | Pt, Sn/Mg(Al)O                                                                                                                                              | CO <sub>2</sub>                  | 98.7  | 6.1  | 600 | -    | 43     |
| 41 | Ni-Nb-O                                                                                                                                                     | O <sub>2</sub>                   | 83    | 20.5 | 375 | -    | 44     |
|    | MoV <sub>0.1</sub> Nb <sub>0.19</sub> O <sub>x</sub>                                                                                                        | O <sub>2</sub>                   | 44.8  | 24.3 | 380 | -    | 45     |
| 42 | MoV <sub>0.18</sub> Sb <sub>0.18</sub> O <sub>x</sub>                                                                                                       |                                  | 75.5  | 45.6 |     | -    |        |
|    | MoV <sub>0.51</sub> Te <sub>0.16</sub> O <sub>x</sub>                                                                                                       |                                  | 73.7  | 46.3 |     | -    |        |
|    | MoV <sub>0.21</sub> Te <sub>0.16</sub> Nb <sub>0.18</sub> O <sub>x</sub>                                                                                    |                                  | 85.4  | 25.1 |     | -    |        |

|    |                                                                                             |                                             |       |       |         |       |    |
|----|---------------------------------------------------------------------------------------------|---------------------------------------------|-------|-------|---------|-------|----|
| 43 | Mo <sub>11</sub> VP                                                                         | O <sub>2</sub>                              | 67.7  | 14.3  | 550     | 8.8   | 46 |
|    | Nano-NiO                                                                                    | O <sub>2</sub>                              | 45.4  | 35    | 350     | 15.9  | 47 |
|    | Meso-NiO                                                                                    |                                             | 51.5  | 43.3  | 450     | 22.5  |    |
| 44 | Meso-NiMgO                                                                                  |                                             | 53.18 | 56.6  | 450     | 30.1  |    |
| 45 | CoO <sub>x</sub> /MgAl <sub>2</sub> O <sub>4</sub> -HT<br>(Hydrothermal)                    | CO <sub>2</sub>                             | 89.5  | 55.2  | 650     | 49.4  | 48 |
|    | CoO <sub>x</sub> /MgAl <sub>2</sub> O <sub>4</sub> -CP (Co-precipitation)                   |                                             | 85.5  | 50.5  |         | 43.18 |    |
| 46 | BaCe <sub>0.85</sub> Y <sub>0.15</sub> O <sub>3-δ</sub>                                     |                                             | 90    | 35    | 700     | -     | 49 |
| 47 | BaCe <sub>0.85</sub> Y <sub>0.15</sub> O <sub>3-δ</sub>                                     |                                             | 90.5  | 36.7  | 700     | -     | 50 |
|    | Pt/ Mg(Al)O                                                                                 | O <sub>2</sub>                              | 99.9  | 0.66  | 600     | -     | 51 |
| 48 | Pt-Sn/Mg(Al)O                                                                               |                                             | 99.9  | 2.6   |         | -     |    |
|    | Pt-Sn/Al <sub>2</sub> O <sub>3</sub>                                                        | O <sub>2</sub> mixed<br>with H <sub>2</sub> | 91.4  | 8.3   | 700     | -     | 52 |
| 49 | LaMnO <sub>3</sub>                                                                          |                                             | 71.4  | 13.8  |         | -     |    |
|    | Ni-Nb-O                                                                                     | O <sub>2</sub>                              | 90    | 4.4   | 400     | -     | 53 |
|    | Ni-Ta-O                                                                                     |                                             | 90    | 0.36  |         | -     |    |
|    | Ni-Ti-O                                                                                     |                                             | 84.9  | 3.1   |         | -     |    |
| 50 | Ni-Al-O                                                                                     |                                             | 63.5  | 8.91  |         | -     |    |
|    | Ni-Ga-O                                                                                     |                                             | 54    | 9.17  |         | -     |    |
|    | Ni-Mg-O                                                                                     |                                             | 28.6  | 7.5   |         | -     |    |
|    | Ni-Li-O                                                                                     |                                             | 19    | 5.26  |         | -     |    |
| 51 | MoV <sub>0.4</sub> Nb <sub>0.27</sub> O <sub>y</sub>                                        | O <sub>2</sub>                              | 76.9  | 10    | 400     | -     | 54 |
| 52 | Ni <sub>0.85</sub> Nb <sub>0.15</sub> O                                                     | O <sub>2</sub>                              | 78    | 33    | 350     | 25.7  | 55 |
| 53 | 5-CoO <sub>x</sub> /MgAl <sub>2</sub> O <sub>4</sub>                                        | CO <sub>2</sub>                             | 98.4  | 47.5  | 650     | 9.4   | 56 |
|    | Mo <sub>0.16</sub> Nb <sub>3.4</sub> O <sub>m</sub>                                         | O <sub>2</sub>                              | 70.17 | 0.82  | 380     | -     | 57 |
| 54 | Mo <sub>2.3</sub> Nb <sub>2.7</sub> O <sub>m</sub>                                          |                                             | 67.87 | 3.49  |         | -     |    |
| 55 | Ni <sub>2</sub> -Al-500                                                                     | O <sub>2</sub>                              | 73.1  | 23.1  | 500     | 16.9  | 58 |
| 56 | NiW0.36                                                                                     | O <sub>2</sub>                              | 60    | 5     | 400     | -     | 59 |
| 57 | NiO-CeO <sub>2</sub>                                                                        | O <sub>2</sub>                              | 59    | 10.4  | 275     | 6.14  | 60 |
| 58 | Nb <sub>0.03</sub> Ni <sub>0.97</sub> O                                                     | O <sub>2</sub>                              | 62    | 41    | 350     | 25    | 61 |
|    | Nb <sub>0.04</sub> Ni <sub>0.96</sub> O                                                     |                                             | 64    | 39    |         | 25    |    |
| 59 | BaCl <sub>2</sub> -TiO <sub>2</sub> -SnO <sub>2</sub>                                       | O <sub>2</sub>                              | 92.6  | 65.5  | 720     | 60.4  | 62 |
| 60 | Orthorhombic MO <sub>3</sub> VO <sub>3</sub>                                                | O <sub>2</sub>                              | 81.8  | 56    | 335     | -     | 63 |
| 61 | NiWO                                                                                        | O <sub>2</sub>                              | 59.5  | 11.8  | 450     | -     | 64 |
| 62 | NiSn                                                                                        | O <sub>2</sub>                              | 87    | 10    | 300     | -     | 65 |
|    | NiLa                                                                                        |                                             | 56    | 10    |         | -     |    |
|    | NiZr                                                                                        |                                             | 78    | 10    |         | -     |    |
| 63 | M1(Sb, Nb)- V- 6.6                                                                          | O <sub>2</sub>                              | 97    | 10    | 385     | -     | 66 |
|    | M1(Te)- V- 6.8                                                                              |                                             | 95    | 10    |         | -     |    |
|    | Ga-NiO                                                                                      | O <sub>2</sub>                              | 53    | 10    | 400     | -     | 67 |
| 64 | Nb-NiO                                                                                      |                                             | 88.3  | 10    |         | -     |    |
|    | Li-NiO                                                                                      |                                             | 17.9  | 10    |         | -     |    |
| 65 | NiNb-E1                                                                                     | O <sub>2</sub>                              | 81.8  | 28.3  | 350     | 23.1  | 68 |
|    | NiNb-C1                                                                                     |                                             | 77.3  | 17.8  |         | 13.8  |    |
| 66 | Ni <sub>70</sub> Al <sub>30</sub> -org                                                      | O <sub>2</sub>                              | 82    | 14    | 350     | -     | 69 |
| 67 | MoVNbTeO <sub>x</sub>                                                                       | O <sub>2</sub>                              | 85    | 73    | 460     | -     | 70 |
| 68 | Ni <sub>85</sub> Nb <sub>15</sub> (300)                                                     | O <sub>2</sub>                              | 70    | 40    | 330     | -     | 71 |
| 69 | Ni-Nb-Cr-O                                                                                  | O <sub>2</sub> and<br>CO <sub>2</sub>       | 65    | 26    | 450     | 32    | 72 |
| 70 | VO <sub>x</sub> /Al <sub>2</sub> O <sub>3</sub> -ZrO <sub>2</sub>                           | Lattice<br>oxygen                           | 89    | 11    | 525-600 | -     | 73 |
| 71 | Cr/ZrO <sub>2</sub>                                                                         | CO <sub>2</sub>                             | -     | 47.56 | 700     | 43.17 | 74 |
|    | Nb-NiO                                                                                      | O <sub>2</sub>                              | 83.4  | 8.6   | 450     | -     | 75 |
| 72 | Sn-NiO                                                                                      |                                             | 83.7  | 8.8   |         | -     |    |
| 73 | NiO/TiO <sub>2</sub>                                                                        | O <sub>2</sub>                              | 74.5  | 55    | 400     | 41    | 76 |
| 74 | Mo <sub>1</sub> V <sub>0.3</sub> Te <sub>0.23</sub> Nb <sub>0.12</sub> Bi <sub>0.025</sub>  | O <sub>2</sub>                              | 95    | 37    | 400     | -     | 77 |
| 75 | Ni <sub>0.85</sub> Ce <sub>0.075</sub> Zr <sub>0.075</sub> O/Al <sub>2</sub> O <sub>3</sub> | O <sub>2</sub>                              | 54.6  | 37.5  | 450     | -     | 78 |
| 76 | CeO <sub>2</sub> -NiO-Al <sub>2</sub> O <sub>3</sub> /Ni-foam                               | O <sub>2</sub>                              | 55    | 37    | 450     | -     | 79 |
| 77 | NaW-Mg <sub>6</sub> MnO <sub>8</sub>                                                        | Lattice                                     | 87    | 64    | 850     | 55    | 80 |

|    |                                                                                 | oxygen          |      |      |     |       |    |
|----|---------------------------------------------------------------------------------|-----------------|------|------|-----|-------|----|
| 78 | Nb <sub>2</sub> O <sub>5</sub> -NiO/Ni-foam                                     | O <sub>2</sub>  | 68   | 60   | 410 | -     | 81 |
| 79 | CeO <sub>2</sub> -ZrO <sub>2</sub> -NiO-Al <sub>2</sub> O <sub>3</sub> /Ni-foam | O <sub>2</sub>  | 60.6 | 40.3 | 500 | 24.4  | 82 |
| 80 | BaO-CeO <sub>2</sub> -ZrO <sub>2</sub>                                          | O <sub>2</sub>  | 48.5 | 55.7 | 700 | 27.01 | 83 |
|    | BaCl <sub>2</sub> -TiO <sub>2</sub> -SnO <sub>2</sub>                           |                 | 97.6 | 13.7 |     | 13.4  |    |
| 81 | NiO/Ti-Si-O                                                                     | O <sub>2</sub>  | 83.3 | 9.5  | 400 | -     | 84 |
| 82 | 0.5CeNiNb                                                                       | O <sub>2</sub>  | 65   | 15   | 400 | -     | 85 |
| 83 | NiO/P25TiO <sub>2</sub>                                                         | O <sub>2</sub>  | 89   | 10   | 450 | -     | 86 |
|    | NiO/PCH-Ti                                                                      |                 | 78   | 10   |     | -     |    |
| 84 | CrO <sub>x</sub> /Al <sub>2</sub> O <sub>3</sub>                                | CO <sub>2</sub> | 90   | 14   | 700 | -     | 87 |
|    | CrO <sub>x</sub> /ZrO <sub>2</sub>                                              |                 | 80   | 5    |     | -     |    |

Table S2. Catalytic performance of molecular sieves in the ethane ODH reaction

| Data point No. in Figure 47 | Catalyst support                                    | Oxidant          | Selectivity % | Conversion % | Temperature (°C) | Yield % | Ref. |
|-----------------------------|-----------------------------------------------------|------------------|---------------|--------------|------------------|---------|------|
| 85                          | CoH-BEA                                             | O <sub>2</sub>   | 60.5          | 5.2          | 450              | -       | 88   |
|                             | CoH-MFI                                             |                  | 54.7          | 5.2          |                  | -       |      |
|                             | CoH-MOR                                             |                  | 76.2          | 2.2          |                  | -       |      |
|                             | CoH-FER                                             |                  | 78.3          | 0.8          |                  | -       |      |
| 86                          | Fe-H(Al)ZSM-5                                       | N <sub>2</sub> O | 75            | 44           | 350              | -       | 89   |
|                             | H(Fe)ZSM-5                                          |                  | 58.4          | 62.7         |                  | -       |      |
| 87                          | Cr/H-ZSM-5(1900)                                    | CO <sub>2</sub>  | 68.2          | 69.5         | 650              | -       | 90   |
| 88                          | 10%Ce/SBA-15/Al <sub>2</sub> O <sub>3</sub> /FeCrAl | CO <sub>2</sub>  | 87.2          | 63.9         | 750              | 55.7    | 91   |
| 89                          | 5Cr-10Ce/SBA-15                                     | CO <sub>2</sub>  | 96            | 55           | 700              | 52.8    | 92   |
| 90                          | 5%Cr/SBA-15/Al <sub>2</sub> O <sub>3</sub> /FeCrAl  | CO <sub>2</sub>  | 95.5          | 66.5         | 750              | 63.5    | 93   |
| 91                          | Ni/HY                                               | O <sub>2</sub>   | 74.5          | -            | 600              | 15.8    | 94   |
|                             | Cu/HY                                               |                  | 45.3          | -            |                  | 5.5     |      |
| 92                          | Ga <sub>2</sub> O <sub>3</sub> /HZSM-5(97)          | CO <sub>2</sub>  | 93.7          | 14.5         | 500-650          | 13.6    | 95   |
|                             | LiCl/HZSM-5                                         | O <sub>2</sub>   | 88            | 84.1         | 650              | 74.1    | 96   |
| 93                          | Ni/K-Y                                              | O <sub>2</sub>   | 77.9          | 18.8         | 600              | -       | 97   |
|                             | Co/K-Y                                              |                  | 30.7          | 17.3         |                  | -       |      |
|                             | Cu/K-Y                                              |                  | 23.6          | 17           |                  | -       |      |
|                             | Fe/K-Y                                              |                  | 35.5          | 11.7         |                  | -       |      |
| 94                          | V-SBA-16                                            | O <sub>2</sub>   | 63.3          | 40.7         | 600              | -       | 98   |
| 95                          | CrAPSO                                              | CO <sub>2</sub>  | 94.8          | 40           | 700              | -       | 99   |
| 96                          | (NaMg)/NaY                                          | O <sub>2</sub>   | 100           | 2            | 500              | 2       | 100  |
|                             | (NaMg)/NaY-La(Cl)                                   |                  |               | 2            |                  | 2       |      |
|                             | (KMg)/NaY-La(Cl)                                    |                  |               | 27           |                  | 27      |      |
|                             | (RbMg)/NaY-La(Cl)                                   |                  |               | 40           |                  | 40      |      |
|                             | (CsMg)/NaY-La(Cl)                                   |                  |               | 7            |                  | 7       |      |
|                             | (NaKMg)/NaY                                         |                  |               | 8            |                  | 8       |      |
|                             | (NaKMg)/NaY-La(Cl)                                  |                  |               | 20           |                  | 20      |      |
|                             | (NaKMg)/NaY-La(N)                                   |                  |               | 12           |                  | 12      |      |
|                             | (NaKMg)/NaY-Tb(N)                                   |                  |               | 18           |                  | 18      |      |

## References

1. O. V. Buyevskaya, D. Wolf and M. Baerns, *Catalysis Today*, 2000, **62**, 91-99.
2. V. R. Choudhary, S. A. R. Mulla and V. H. Rane, *Applied Energy*, 2000, **66**, 51-62.
3. P. Ciambelli, L. Lisi, R. Pirone, G. Ruoppolo and G. Russo, *Catalysis Today*, 2000, **61**, 317-323.
4. H. X. Dai, C. F. Ng and C. T. Au, *Journal of Catalysis*, 2000, **193**, 65-79.
5. H. X. Dai, C. F. Ng and C. T. Au, *Journal of Catalysis*, 2000, **189**, 52-62.
6. H. X. Dai, C. F. Ng and C. T. Au, *Catalysis Letters*, 2000, **67**, 183-192.
7. H. X. Dai, H. He, C. F. Ng and C. T. Au, *Journal of Molecular Catalysis A: Chemical*, 2000, **171**, 217-227.
8. J. E. Miller, A. G. Sault, D. E. Trudell, T. M. Nenoff, S. G. Thoma and N. B. Jackson, *Applied Catalysis A: General*, 2000, **201**, 45-54.
9. T. Osawa, P. Ruiz and B. Delmon, *Catalysis Today*, 2000, **61**, 309-315.
10. B. Solsona, J. M. López-Nieto, M. Alcántara-Rodríguez, E. Rodríguez-Castellón and A. Jiménez-López, *Journal of Molecular Catalysis A: Chemical*, 2000, **153**, 199-207.
11. W. Ueda and K. Oshihara, *Applied Catalysis A: General*, 2000, **200**, 135-143.
12. A. Aaddane, M. Kacimi and M. Ziyad, *Catalysis Letters*, 2001, **73**, 47-53.
13. A. Beretta and P. Forzatti, *Journal of Catalysis*, 2001, **200**, 45-58.
14. H. X. Dai, C. F. Ng and C. T. Au, *Journal of Catalysis*, 2001, **197**, 251-266.
15. H. X. Dai, C. T. Au, Y. Chan, K. C. Hui and Y. L. Leung, *Applied Catalysis A: General*, 2001, **213**, 91-102.
16. J.-S. Min and N. Mizuno, *Catalysis Today*, 2001, **66**, 47-52.
17. S. A. R. Mulla, O. V. Buyevskaya and M. Baerns, *Journal of Catalysis*, 2001, **197**, 43-48.
18. H. X. Dai, H. He and C. T. Au, *Industrial & Engineering Chemistry Research*, 2002, **41**, 37-45.
19. F. Donsi, R. Pirone and G. Russo, *Journal of Catalysis*, 2002, **209**, 51.
20. J. E. Miller, M. M. Gonzales, L. Evans, A. G. Sault, C. Zhang, R. Rao, G. Whitwell, A. Maiti and D. King-Smith, *Applied Catalysis A: General*, 2002, **231**, 281.
21. S. A. R. Mulla, O. V. Buyevskaya and M. Baerns, *Applied Catalysis A: General*, 2002, **226**, 73.
22. P. Botella, J. M. López Nieto, A. Dejoz, M. I. Vázquez and A. Martínez-Arias, *Catalysis Today*, 2003, **78**, 507-512.
23. Z.-S. Chao and E. Ruckenstein, *Catalysis Letters*, 2003, **88**, 147-154.
24. S. Gaab, M. Machli, J. Find, R. K. Grasselli and J. A. Lercher, *Topics in Catalysis*, 2003, **23**, 151-158.
25. G. Grubert, E. Kondratenko, S. Kolf, M. Baerns, P. van Geem and R. Parton, *Catalysis Today*, 2003, **81**, 337-345.
26. G. Karamullaoglu and T. Dogu, *Chemical Engineering Communications*, 2003, **190**, 1427-1438.
27. Y. Liu, P. Cong, R. D. Doolen, S. Guan, V. Markov, L. Woo, S. Zeyß and U. Dingerdissen, *Applied Catalysis A: General*, 2003, **254**, 59-66.
28. B. Solsona, V. A. Zazhigalov, J. M. López Nieto, I. V. Bacherikova and E. A. Diyuk, *Applied Catalysis A: General*, 2003, **249**, 81-92.
29. P. Botella, E. García-González, A. Dejoz, J. M. López Nieto, M. I. Vázquez and J. González-Calbet, *Journal of Catalysis*, 2004, **225**, 428-438.
30. J. M. López Nieto, P. Botella, P. Concepción, A. Dejoz and M. I. Vázquez, *Catalysis Today*, 2004, **91-92**, 241-245.
31. K. Elkabouss, M. Kacimi, M. Ziyad, S. Ammar and F. Bozon-Verduraz, *Journal of Catalysis*, 2004, **226**, 16-24.
32. J. M. Galownia, A. P. Wight, A. Blanc, J. A. Labinger and M. E. Davis, *Journal of Catalysis*, 2005, **236**, 356-365.
33. L. Lisi, G. Ruoppolo, M. P. Casaletto, P. Galli, M. A. Massucci, P. Patrono and F. Pinzari, *Journal of Molecular Catalysis A: Chemical*, 2005, **232**, 127-134.
34. Q. Xie, L. Chen, W. Weng and H. Wan, *Journal of Molecular Catalysis A: Chemistry*, 2005, **240**, 191-196.
35. P. Botella, A. Dejoz, J. M. López Nieto, P. Concepción and M. I. Vázquez, *Applied Catalysis A: General*, 2006, **298**, 16-23.
36. E. Heracleous and A. A. Lemonidou, *Journal of Catalysis*, 2006, **237**, 162-174.
37. E. Heracleous and A. A. Lemonidou, *Journal of Catalysis*, 2006, **237**, 175-189.
38. X. Zhao and X. Wang, *Catalysis Communications*, 2006, **7**, 633-638.
39. G. Karamullaoglu and T. Dogu, *Industrial & Engineering Chemistry Research*, 2007, **46**, 7079-7086.
40. E. Heracleous, A. Delimitis, L. Nalbandian and A. A. Lemonidou, *Applied Catalysis A: General*, 2007, **325**, 220-226.
41. B. Tope, Y. Zhu and J. A. Lercher, *Catalysis Today*, 2007, **123**, 113-121.
42. X. Zhang, Q. Ye, B. Xu and D. He, *Catalysis Letters*, 2007, **117**, 140-145.
43. A. Virnovskaia, E. Rytter and U. Olsbye, *Industrial & Engineering Chemistry Research*, 2008, **47**, 7167-7177.
44. E. López, E. Heracleous, A. A. Lemonidou and D. O. Borio, *Chemical Engineering Journal*, 2008, **145**, 308-315.
45. P. Botella, A. Dejoz, M. C. Abello, M. I. Vázquez, L. Arrúa and J. M. López Nieto, *Catalysis Today*, 2009, **142**, 272-277.
46. N. Haddad, E. Bordes-Richard and A. Barama, *Catalysis Today*, 2009, **142**, 215-219.
47. J. Li, R. Li, C. Wang, C. Huang, W. Weng and H. Wan, *Chinese Journal of Catalysis*, 2009, **30**, 714-716.
48. X. Zhang, *Materials Chemistry and Physics*, 2009, **116**, 415-420.
49. X.-Z. Fu, J.-L. Luo, A. R. Sanger, N. Luo and K. T. Chuang, *Journal of Power Sources*, 2010, **195**, 2659-2663.
50. X.-Z. Fu, J.-L. Luo, A. R. Sanger, Z.-R. Xu and K. T. Chuang, *Electrochimica Acta*, 2010, **55**, 1145-1149.
51. V. Galvita, G. Siddiqi, P. Sun and A. T. Bell, *Journal of Catalysis*, 2010, **271**, 209-219.
52. S. F. Håkonsen, J. C. Walmsley and A. Holmen, *Applied Catalysis A: General*, 2010, **378**, 1-10.
53. E. Heracleous and A. A. Lemonidou, *Journal of Catalysis*, 2010, **270**, 67-75.
54. T. Y. Kardash, L. M. Plyasova, V. M. Bondareva, T. V. Andrushkevich, L. S. Dovlitova, A. I. Ischenko, A. I. Nizovskii and A. V. Kalinkin, *Applied Catalysis A: General*, 2010, **375**, 26-36.

55. B. Savova, S. Loridant, D. Filkova and J. M. M. Millet, *Applied Catalysis A: General*, 2010, **390**, 148-157.
56. X. Zhang, in *Advances in CO<sub>2</sub> Conversion and Utilization*, American Chemical Society, 2010, vol. 1056, ch. 7, pp. 103-124.
57. A. Simon and E. V. Kondratenko, *Applied Catalysis A: General*, 2011, **392**, 199-207.
58. L. Smoláková, L. Čapek, Š. Botková, F. Kovanda, R. Bulánek and M. Pouzar, *Topics in Catalysis*, 2011, **54**, 1151-1162.
59. B. Solsona, J. M. López Nieto, P. Concepción, A. Dejoz, F. Ivars and M. I. Vázquez, *Journal of Catalysis*, 2011, **280**, 28-39.
60. B. Solsona, P. Concepción, S. Hernández, B. Demicol and J. M. L. Nieto, *Catalysis Today*, 2012, **180**, 51-58.
61. H. Zhu, S. Ould-Chikh, D. H. Anjum, M. Sun, G. Biaisque, J.-M. Basset and V. Caps, *Journal of Catalysis*, 2012, **285**, 292-303.
62. Z. Wang, L. Chen, G. Zou, X. Luo, R. Gao, L. Chou and X. Wang, *Catalysis Communications*, 2012, **25**, 45-49.
63. T. Konya, T. Katou, T. Murayama, S. Ishikawa, M. Sadakane, D. Buttrey and W. Ueda, *Catalysis Science & Technology*, 2013, **3**, 380-387.
64. S. Agouram, A. Dejoz, F. Ivars, I. Vázquez, J. M. López Nieto and B. Solsona, *Fuel Processing Technology*, 2014, **119**, 105-113.
65. J. M. López Nieto, B. Solsona, R. K. Grasselli and P. Concepción, *Topics in Catalysis*, 2014, **57**, 1248-1255.
66. T. T. Nguyen, B. Deniau, P. Delichere and J.-M. M. Millet, *Topics in Catalysis*, 2014, **57**, 1152-1162.
67. I. Popescu, E. Heracleous, Z. Skoufa, A. Lemonidou and I.-C. Marcu, *Physical Chemistry Chemical Physics*, 2014, **16**, 4962-4970.
68. J. Santander, E. López, A. Diez, M. Dennehy, M. Pedrera and G. Tonetto, *Chemical Engineering Journal*, 2014, **255**, 185-194.
69. Z. Skoufa, G. Xantri, E. Heracleous and A. A. Lemonidou, *Applied Catalysis A: General*, 2014, **471**, 107-117.
70. B. Chu, L. Truter, T. A. Nijhuis and Y. Cheng, *Applied Catalysis A: General*, 2015, **498**, 99-106.
71. H. Zhu, D. C. Rosenfeld, D. H. Anjum, V. Caps and J.-M. Basset, *ChemSusChem*, 2015, **8**, 1254-1263.
72. A. Qiao, V. N. Kalevaru, J. Radnik and A. Martin, *Catalysis Today*, 2016, **264**, 144-151.
73. A. H. Elbadawi, M. S. Ba-Shammakh, S. Al-Ghamdi, S. A. Razzak and M. M. Hossain, *Chemical Engineering Journal*, 2016, **284**, 448-457.
74. A. Talati, M. Haghghi and F. Rahmani, *RSC Advances*, 2016, **6**, 44195-44204.
75. D. Delgado, B. Solsona, A. Ykrelef, A. Rodríguez-Gómez, A. Caballero, E. Rodríguez-Aguado, E. Rodríguez-Castellón and J. M. López Nieto, *The Journal of Physical Chemistry C*, 2017, **121**, 25132-25142.
76. R. Sanchis, D. Delgado, S. Agouram, M. D. Soriano, M. I. Vázquez, E. Rodríguez-Castellón, B. Solsona and J. M. L. Nieto, *Applied Catalysis A: General*, 2017, **536**, 18-26.
77. E. V. Ishchenko, R. V. Gulyaev, T. Y. Kardash, A. V. Ishchenko, E. Y. Gerasimov, V. I. Sobolev and V. M. Bondareva, *Applied Catalysis A: General*, 2017, **534**, 58-69.
78. J. P. Bortolozzi, R. Portela, P. Ávila, V. Milt and E. Miró, *Catalysts*, 2017, **7**, 331.
79. Z. Zhang, L. Han, R. Chai, Q. Zhang, Y. Li, G. Zhao, Y. Liu and Y. Lu, *Catalysis Communications*, 2017, **88**, 90-93.
80. S. Yusuf, L. M. Neal and F. Li, *ACS Catalysis*, 2017, **7**, 5163-5173.
81. Z. Zhang, G. Zhao, R. Chai, J. Zhu, Y. Liu and Y. Lu, *Catalysis Science & Technology*, 2018, **8**, 4383-4389.
82. Z. Zhang, J. Ding, R. Chai, G. Zhao, Y. Liu and Y. Lu, *Applied Catalysis A: General*, 2018, **550**, 151-159.
83. V. A. Bolotov, V. V. Chesnokov, Y. Y. Tanashev and V. N. Parmon, *Chemical Engineering and Processing - Process Intensification*, 2018, **129**, 103-108.
84. A. Ykrelef, L. Nadjji, R. Issaadi, S. Agouram, E. Rodríguez-Castellón, B. Solsona and J. M. López Nieto, *Catalysis Today*, 2018, **299**, 93-101.
85. J. L. Park, S. K. Balijepalli, M. D. Argyle and K. J. Stowers, *Industrial & Engineering Chemistry Research*, 2018, **57**, 5234-5240.
86. D. Delgado, R. Sanchis, J. A. Cecilia, E. Rodríguez-Castellón, A. Caballero, B. Solsona and J. M. L. Nieto, *Catalysis Today*, 2019, **333**, 10-16.
87. T. A. Bugrova, V. V. Dutov, V. A. Svetlichnyi, V. C. Corberán and G. V. Mamontov, *Catalysis Today*, 2019, **333**, 71-80.
88. R. Bulánek, K. Novoveská and B. Wichterlová, *Applied Catalysis A: General*, 2002, **235**, 181.
89. A. V. Kucherov, V. D. Nissenbaum, T. N. Kucherova and L. M. Kustov, *Kinetics and Catalysis*, 2002, **43**, 99-106.
90. N. Mimura, I. Takahara, M. Inaba, M. Okamoto and K. Murata, *Catalysis Communications*, 2002, **3**, 257.
91. X. Shi, S. Ji, K. Wang and C. Li, *Catalysis Letters*, 2008, **126**, 426-435.
92. X. Shi, S. Ji and K. Wang, *Catalysis Letters*, 2008, **125**, 331-339.
93. X. Shi, S. Ji, K. Wang and C. Li, *Energy & Fuels*, 2008, **22**, 3631-3638.
94. X. Lin, C. A. Hoel, W. M. H. Sachtler, K. R. Poepelmeier and E. Weitz, *Journal of Catalysis*, 2009, **265**, 54-62.
95. Z. Shen, J. Liu, H. Xu, Y. Yue, W. Hua and W. Shen, *Applied Catalysis A: General*, 2009, **356**, 148-153.
96. Y. B. Zhao, W. W. Tan, H. Li, X. H. Jia and H. L. Wan, *Chinese Chemical Letters*, 2010, **21**, 1366-1369.
97. X. Lin, K. R. Poepelmeier and E. Weitz, *Applied Catalysis A: General*, 2010, **381**, 114-120.
98. L. Kong, J. Li, Q. Liu, Z. Zhao, Q. Sun, J. Liu and Y. Wei, *Journal of Energy Chemistry*, 2016, **25**, 577-586.
99. F. Rahmani and M. Haghghi, *Korean Journal of Chemical Engineering*, 2016, **33**, 2555-2566.
100. F. Ayari, R. Charrad, E. Asedegbega-Nieto, M. Mhamdi, G. Delahay, F. Farhat and A. Ghorbel, *Microporous and Mesoporous Materials*, 2017, **250**, 65-71.
